# Supplementary material
Source: Springer Nature journal article supplement (https://www.springermedizin.de/resource/supplementary/12889_2011_4231_MOESM1_ESM.pdf/9492282)

Type of Food Insecurity

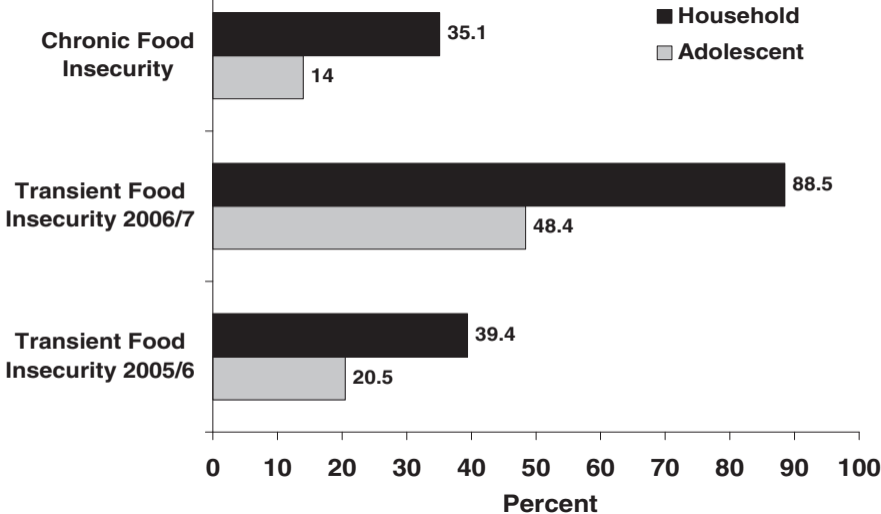

Supplement: MOESM1 [file 9492282]
